# Supplementary material
Source: publisher site journal article supplement (https://www.dovepress.com/article/412762)
Supplement: Supplementary file 1 [file get_supplementary_file.php]

## SUPPLEMENTARY MATERIAL

Rutland CJ, et al.

### Supplementary Table 1

#### List of Independent Ethics Committees or Institutional Review Boards

| <u>Name of EC or IRB</u>                                  | <u>Name of Chair(s)</u>            | <u>IEC or IRB Address</u>                                                                               |
|-----------------------------------------------------------|------------------------------------|---------------------------------------------------------------------------------------------------------|
| Saint Louis University<br>Institutional Review<br>Board   | Raymond Tait                       | 3556 Caroline St.<br>Saint Louis, MO<br>63104, USA                                                      |
| Office for the Protection<br>of Research Subjects         | Darren R. Gitelman, M.D.           | Rubloff Hall, 7th Floor<br>750 N. Lake Shore Dr.<br>Chicago, IL 60611<br>USA                            |
| USC Institutional<br>Review Board                         | Darcy Spicer, M.D.                 | IRD Building Room 420<br>2020 Zonal Avenue<br>Los Angeles, CA 90033<br>USA                              |
| Wake Forest University<br>IRB                             | Richard Weinberg, M.D.             | The Office of Research<br>Medical Center Blvd<br>Winston-Salem NC 27157<br>USA                          |
| University of Texas IRB                                   | Joseph Schmeiz, Ph.D.              | 7703 Floyd Curl Dr.<br>Room 2.500U<br>San Antonio, TX 78229<br>USA                                      |
| WIRB                                                      | Theodore Schultz                   | 3535 7th Ave SW<br>Olympia, WA 98502<br>USA                                                             |
| St. Luke's Hospital IRB                                   | John S. Meyer, M.D.                | 232 South Woods Mill Rd<br>Chesterfield, MO 63017<br>USA                                                |
| Geisinger Institutional<br>Review Board                   | Nancy Moody, JD, MA                | 100 North Academy Ave<br>Danville, PA 17822<br>USA                                                      |
| Vanderbilt University<br>Institutional Review<br>Board    | G. Kyle Rybczyk, R.N.C.,<br>F.N.P. | Room 508 Oxford House<br>Nashville, TN 37232<br>USA                                                     |
| Partners Human<br>Research Committee                      | Elizabeth L. Hohmann,<br>M.D.      | 116 Huntington Ave, Suite 102<br>Boston, MA 02116<br>USA                                                |
| Baylor College of<br>Medicine and Affiliated<br>Hospitals | Stacey Berg                        | One Baylor Plaza, 600D<br>Houston, TX 77030<br>USA                                                      |
| University of Florida<br>Health and Science IRB           | Peter Iafrate, Pharm.D             | Gainesville Health Science Center<br>Communicore Building CB-172<br>Box 100173<br>Gainesville, FL 32610 |

| <b><u>Name of EC or IRB</u></b>                     | <b><u>Name of Chair(s)</u></b>                     | <b><u>IEC or IRB Address</u></b>                                                               |
|-----------------------------------------------------|----------------------------------------------------|------------------------------------------------------------------------------------------------|
|                                                     |                                                    | USA                                                                                            |
| BioMedical Research Alliance of New York            | Raffaella Hart, CIP                                | 225 Community Dr., Suite 100<br>Great Neck, NY 11021<br>USA                                    |
| Winthrop IRB                                        | Harry Staszewski                                   | 222 Station Plaza North, Suite 521<br>Mineola, NY 11501<br>USA                                 |
| University Hospital of Brooklyn IRB                 | Eli A. Friedman, M.D.                              | 450 Clarkson Ave., Box 129<br>Brooklyn, NY 11203<br>USA                                        |
| Southern California Kaiser Permanente IRB           | Eric M. Macy, M.D.                                 | 393 East Walnut, 2nd Floor<br>Pasadena, CA 91188<br>USA                                        |
| University of Wisconsin Health Sciences IRB         | Yoram Shenker, M.D.                                | B-3088 VA Hospital<br>2500 Overlook Terrace<br>Madison, WI 53705<br>USA                        |
| IRB (Cleveland Clinic Foundation)                   | Richard Treat, M.D.                                | 13951 Terrace Rd<br>Cleveland, OH 44112<br>USA                                                 |
| St. Joseph Mercy Health System Clinical Rsch. Comm. | James Mitchner, M.D.                               | 5301 East Huron River Dr<br>Ann Arbor, MI 48106<br>USA                                         |
| CTSC UC Davis Health System                         | David Asmuth                                       | 2921 Stockton Blvd,<br>Suite 1400<br>Room 1429<br>Sacramento, CA 95817<br>USA                  |
| Children's Hosp. of Wisconsin Human Rsch Rev Board  | J. Paul Scott, M.D.                                | Children's Corporate Center, C730<br>PO Box 1997<br>Milwaukee, WI 53201, USA                   |
| Metro Health IRB                                    | David Kuentz                                       | Room 103 Rammelkamp<br>2500 Metrohealth Dr<br>Cleveland, OH 44109<br>USA                       |
| University of Kentucky IRB                          | Thomas S. Foster                                   | 315 Kinkead Hall<br>Lexington, KY 40506<br>USA                                                 |
| National Jewish Institutional Review Board          | Ronald Balkissoon, M.D.<br>and Richard Weber, M.D. | 1400 Jackson St<br>Denver, CO 80206<br>USA                                                     |
| University of Illinois at Chicago, IRB              | Indru Punwani                                      | 203 Administrative Office Building<br>M/C 672<br>1737 West Polk St<br>Chicago, IL 60612<br>USA |

| <b><u>Name of EC or IRB</u></b>            | <b><u>Name of Chair(s)</u></b> | <b><u>IEC or IRB Address</u></b>                                                               |
|--------------------------------------------|--------------------------------|------------------------------------------------------------------------------------------------|
| St. Vincent Mercy<br>Medical<br>Center IRB | Ellen W. Bernal                | Mercy Children's Hospital Pediatric<br>IRB<br>2213 Cherry St<br>Toledo, OH 43608<br>USA        |
| Univ of TX Health Ctr at<br>Tyler IRB      | Jody Jensen, M.D.              | 3900 University Blvd<br>Tyler, TX 75799<br>USA                                                 |
| Wayne State University<br>IRB              | James Puklin, M.D.             | 101 East Alexandrine Building<br>Detroit, MI 48201<br>USA                                      |
| The University of<br>Chicago               | Michael Silverstein            | McGiffert Hall, 2nd Floor<br>5751 Woodlawn Ave<br>Chicago, IL 60637<br>USA                     |
| Rush University<br>Medical Center IRB      | Allen Korenblit, M.D.          | 1653 W Congress Parkway<br>Chicago, IL 60612<br>USA                                            |
| Washington Univ<br>Medical Center (HSC)    | Philip Ludbrook, M.D.,CIP      | 660 South Euclid Ave.<br>Campus Box 8089<br>St. Louis, MO 63110                                |
| Moses Cone Memorial<br>Hospital IRB        | Dr. Charles Wilson             | 1200 North Elm St<br>Greensboro, NC 27401<br>USA                                               |
| Copernicus Group IRB                       | Glenn C. Veit, JD, CIP         | One Triangle Drive, Suite 100<br>P.O. Box 110605<br>Research Triangle Park, NC<br>27709<br>USA |

## Supplementary Table 2

List of antitussives taken as concomitant medications by study participants (primary indication of cough symptom relief and not generally used to treat other conditions)

### Non-narcotics

DEXTROMETHORPHAN HYDROBROMIDE/GUAIFENESIN  
BENZONATATE  
DEXTROMETHORPHAN/GUAIFENESIN  
DEXTROMETHORPHAN HYDROBROMIDE  
GUAIFENESIN/HYDROCODONE BITARTRATE  
EUCALYPTUS OIL/MENTHOL  
ANTITUSSIVE NOS  
DEXTROMETHORPHAN  
DEXTROMETHORPHAN HYDROBROMIDE/PROMETHAZINE HYDROCHLORIDE  
GUAIFENESIN/PENTOXHYVERINE  
HERB(S) NOS/MENTHOL  
THROAT LOZENGE NOS  
ACETAMINOPHEN/DEXTROMETHORPHAN HYDROBROMIDE/DOXYLAMINE SUCCINATE  
GUAIFENESIN/PSEUDOEPHEDRINE HYDROCHLORIDE  
GUAIFENESIN/PHENYLEPHRINE HYDROCHLORIDE  
ACETAMINOPHEN/DEXTROMETHORPHAN HYDROBROMIDE/PHENYLEPHRINE HYDROCHLORIDE  
DEXTROMETHORPHAN HYDROBROMIDE/GUAIFENESIN/PHENYLEPHRINE HYDROCHLORIDE  
DEXTROMETHORPHAN HYDROBROMIDE/GUAIFENESIN/PHENYLEPHEDRINE  
ACETAMINOPHEN/DEXTROMETHORPHAN HYDROBROMIDE/DOXYLAMINE  
SUCCINATE/PSEUDOEPHEDRINE HYDROCHLORIDE  
ACETAMINOPHEN/DEXTROMETHORPHAN HYDROBROMIDE/GUAIFENESIN/PHENYLEPHRINE  
HYDROCHLORIDE  
ACETAMINOPHEN/CHLORPHENIRAMINE MALEATE/DEXTROMETHORPHAN  
HYDROBROMIDE/PSEUDOEPHEDRINE HYDROCHLORIDE  
DEXTROMETHORPHAN HYDROBROMIDE/GUAIFENESIN/PSEUDOEPHEDRINE HYDROCHLORIDE  
GUAIFENESIN/HYDROCODONE TARTRATE/PHENYLEPHRINE HYDROCHLORIDE  
GUAIFENESIN/PENTOXHYVERINE/PHENYLEPHRINE HYDROCHLORIDE  
GUAIFENESIN/PHENYLEPHRINE HYDROCHLORIDE/PHENYLPROPANOLAMINE HYDROCHLORIDE  
GUAIFENESIN

### Narcotics

CODEINE PHOSPHATE/PROMETHAZINE HYDROCHLORIDE  
CODEINE PHOSPHATE/GUAIFENESIN  
HOMATROPINE METHYLBROMIDE/HYDROCODONE BITARTRATE  
ANTITUSSIVE NOS/CODEINE PHOSPHATE  
CHLORPHENIRAMINE POLISTIREX/HYDROCODONE POLISTIREX  
CHLORPHENIRAMINE MALEATE/HYDROCODONE BITARTRATE/PHENYLEPHRINE HYDROCHLORIDE  
CODEINE/COLD AND SINUS REMEDIES
